# Supplementary material for: Modeling the epidemic of nonalcoholic fatty liver disease demonstrates an exponential increase in burden of disease
Source: PubMed Central journal article supplement — Hepatology. 2017 Dec 1;67(1):123–33. doi: 10.1002/hep.29466 (PMC5767767; doi:10.1002/hep.29466), 2017-12-01
Supplement: HEP-67-123-s001.pdf [file HEP-67-123-s001.pdf]

# Modeling the Epidemic of Nonalcoholic Fatty Liver Disease Demonstrates an Exponential Increase in Burden of Disease – Appendix

## Table of Contents

|                                                                  |    |
|------------------------------------------------------------------|----|
| Section 1: Model Description .....                               | 2  |
| Section 2: Progression Rates .....                               | 3  |
| Section 3: Back Calculation of New NAFLD Cases (Incidence) ..... | 6  |
| Section 4: Relative Incidence.....                               | 8  |
| Section 5. Delphi Process.....                                   | 11 |
| Section 6: Supplementary Reference List.....                     | 12 |

## Section 1: Model Description

The nonalcoholic fatty liver disease (NAFLD) Markov model was designed using Microsoft Excel® 2007 (Microsoft Corp., Redmond, WA) to track the NAFLD population by fibrosis stage as well as nonalcoholic steatohepatitis (NASH) status from 1950-2050. The relative impact of incident NAFLD cases occurring prior to 1950 was negligible and was not included in the analysis. Model generated uncertainty intervals (UI) were calculated using high/low Beta-PERT distributions around inputs and conducting Monte Carlo analysis using Oracle Crystal Ball® (Oracle Corp., Redwood City, CA, Release 11.1.3708.0).

The model begins with the annual estimated number of incident NAFLD cases (as shown in the figure below). Fibrosis progression of all cases was modeled over time. The number of cases at any stage of liver disease was calculated and tracked by age and gender. The population was aged in one year age cohorts through age 84 and cases aged ≥85 years were tracked as a single cohort. Each year, the population in each age group, except for the ≥85 year cohort, was moved to the next age to simulate aging (after taking into account age specific mortality and new cases). Background population data for the US were obtained from the United Nations' population database by age, gender and one year age cohort (1).

Disease progression was estimated through fibrosis and liver disease stages (Figure 1) with annual adjustment for mortality (background mortality, and excess cardiovascular deaths), as described below. Liver related deaths were handled separately using published progression rates from advanced liver disease stages (decompensated cirrhosis, hepatocellular carcinoma (HCC)) and liver transplantation. Total cases by disease stage were calculated by summing the total cases from the previous year, the previous age, and new cases; and subtracting mortality and progression to subsequent stages as shown below.

$$\begin{aligned} & Total\ Cases_{Stage_x \& Year_y \& Age\ Cohort_z} \\ &= \left( Total\ Cases_{Stage_x \& Year_{y-1} \& Age\ Cohort_{z-1}} \right) + New\ Cases_{Stage_x \& Year_y \& Age\ Cohort_z} \\ &\quad - Mortality_{Stage_x \& Year_y \& Age\ Cohort_z} - Progressed_{Stage_x \& Year_y \& Age\ Cohort_z} \end{aligned}$$

where:

$$\begin{aligned} & New\ Cases_{Stage_x \& Year_y \& Age\ Cohort_z} = \\ & \left( Total\ Cases_{Stage_{x-1} \& Year_{y-1} \& Age\ Cohort_z} \right) (Progression\ Rate_{Stage_{x-1} \rightarrow Stage_x \& Age\ Cohort_z}) \end{aligned}$$

$$Mortality_{Stage_x \& Year_y \& Age Cohort_z} =$$

$$(Total\ Cases_{Stage_x \& Year_{y-1} \& Age Cohort_z})(Adjusted\ Mortality\ Rate_{Age Cohort_z})$$

$$Progressed_{Stage_x \& Year_y \& Age Cohort_z} =$$

$$(Total\ Cases_{Stage_{x-1} \& Year_{y-1} \& Age Cohort_z})(Progression\ Rate_{Stage_x \rightarrow Stage_{x+1} \& Age Cohort_z})$$

**Figure 1. NAFLD Markov Model**

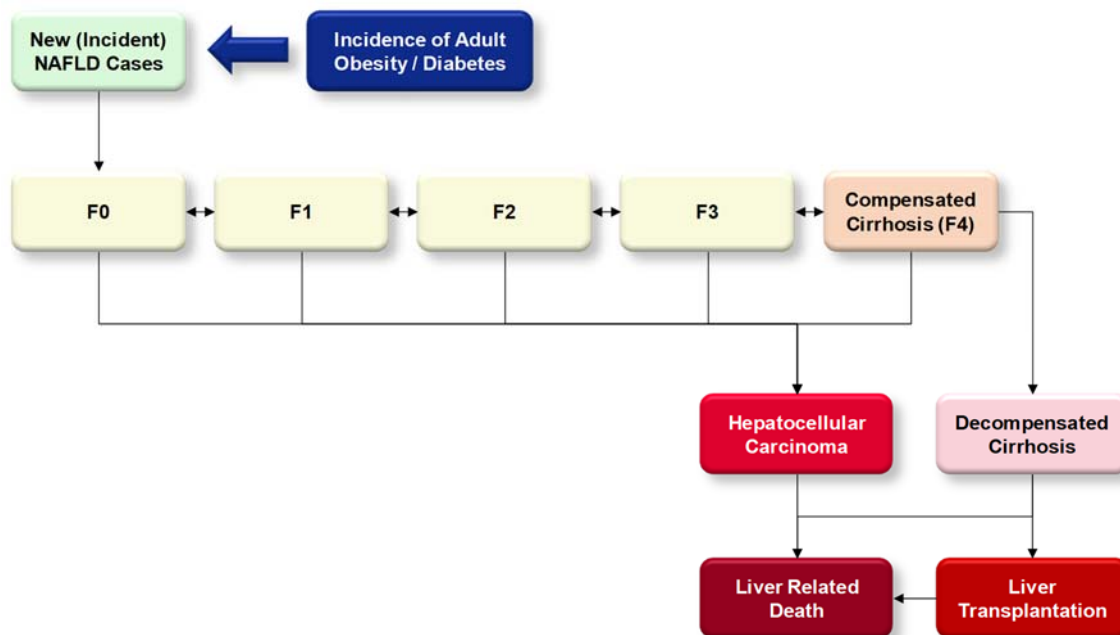

## Section 2: Progression Rates

Disease progression was simulated by multiplying the total number of cases at a particular stage of the disease by a progression rate to the next stage (Figure 1) and validated using national surveillance data for incidence of NAFLD-related HCC, as described below. Age specific fibrosis progression rates were back-calculated based on assumptions for the distribution of cases by NASH status and fibrosis stage, as described below. In addition, the reported numbers of NAFLD related HCC cases, HCC deaths and decompensated cirrhosis cases were available for the US, and fibrosis progression rates were modified to fit reported data (

Table 1). For the purpose of the model, progression rates were assumed to be the sum of forward progression minus the rate of regression, which is common among NAFLD cases based on studies of consecutive liver biopsies (2).

**Table 1. Disease Stage Transitions**

| <u>Disease Stage Transition</u>      | <u>Model Transition Rate</u> | <u>Source</u>   |
|--------------------------------------|------------------------------|-----------------|
| F0 to F1                             | 0.68% – 2.16%                | Back-calculated |
| F0 to HCC                            | 0.00035%                     | (3, 4)          |
| F1 to F2                             | 4.18% – 13.25%               | Back-calculated |
| F1 to HCC                            | 0.0093%                      | (3, 4)          |
| F2 to F3                             | 4.18% – 13.25%               | Back-calculated |
| F2 to HCC                            | 0.019%                       | (3, 4)          |
| F3 to F4 (Cirrhosis)                 | 5.06% – 9.90%                | Back-calculated |
| F3 to HCC                            | 0.038%                       | (3, 4)          |
| Cirrhosis to Decomp Cirrhosis        | 3.79%                        | (5)             |
| Cirrhosis to HCC                     | 0.33%                        | (3, 4)          |
| Decomp Cirrhosis to Liver Rel. Death | 20.0%                        | (5)             |
| HCC to Liver Rel. Death (Yr 1)       | 61.0%                        | (4)             |
| HCC to L.R. Death (Sub Yrs)          | 16.2%                        | (6)             |

Rates of development of HCC were calibrated to national data from the Surveillance, Epidemiology, and End Results Program (SEER) for liver and intrahepatic bile duct cancer incidence (7). It was conservatively assumed that 72% of all liver cancers were HCC (8). In addition, it was assumed that 12.6-14.8% of modeled incident HCC cases during 2004-2009 were attributable to NAFLD/NASH based on a study of SEER and Medicare-linked data for 4,929 HCC cases during the same time period (4). Among the NAFLD/NASH-related HCC cases, it was assumed that 64% would occur among cirrhotics (3). Given the model calculated cirrhotic population, the annual transition rate was estimated at 0.33%. The remaining 36% of incident HCC cases occurred among F0-F3 cases. The incidence rate among F3 cases was

back-calculated and progression decreased exponentially with each decreasing level of fibrosis from 0.038% (F3 to HCC) to 0.00035% (F0 to HCC) (

Table 1). Using data from the SEER-Medicare linkage study (4), it was found that NAFLD-related HCC cases currently experience higher rates of mortality as compared to HCC attributable to HCV. A first year mortality rate of 61% was applied to incident HCC cases, and subsequent year mortality was estimated based on long-term survival data (6). A long term follow up study of individuals with NASH-related cirrhosis reported that 45% experienced liver failure or decompensated cirrhosis defined as an increase in CTP score of 2 points in patients with Child class A cirrhosis over a twelve year time frame (13). An annual progression rate of 3.8% decompensation among cirrhotics was derived from this study and applied in the model.

Transitions between disease states and liver-related mortality rates were compared between the current model and the analysis by Younossi et al., 2016 (9) (

Figure 2), which describes a steady state Markov chain model that simulates NAFLD incidence, disease progression and regression, and was calibrated to published literature and validated using DisMod II (10). The number and characterization of disease states differed between the models, however both models were calibrated to published data, including HCC incidence reported by SEER. The Younossi et al., 2016 model included transition rates that were applied directly to the NAFL and NASH populations, while the current model applied fibrosis transition rates, with the distribution of NAFL and NASH calculated in a separate step based on fibrosis progression among the entire NAFLD population (

Figure 2).

**Figure 2. Comparison of Model and Younossi et al., 2016 Disease State and Mortality Transition Rates**

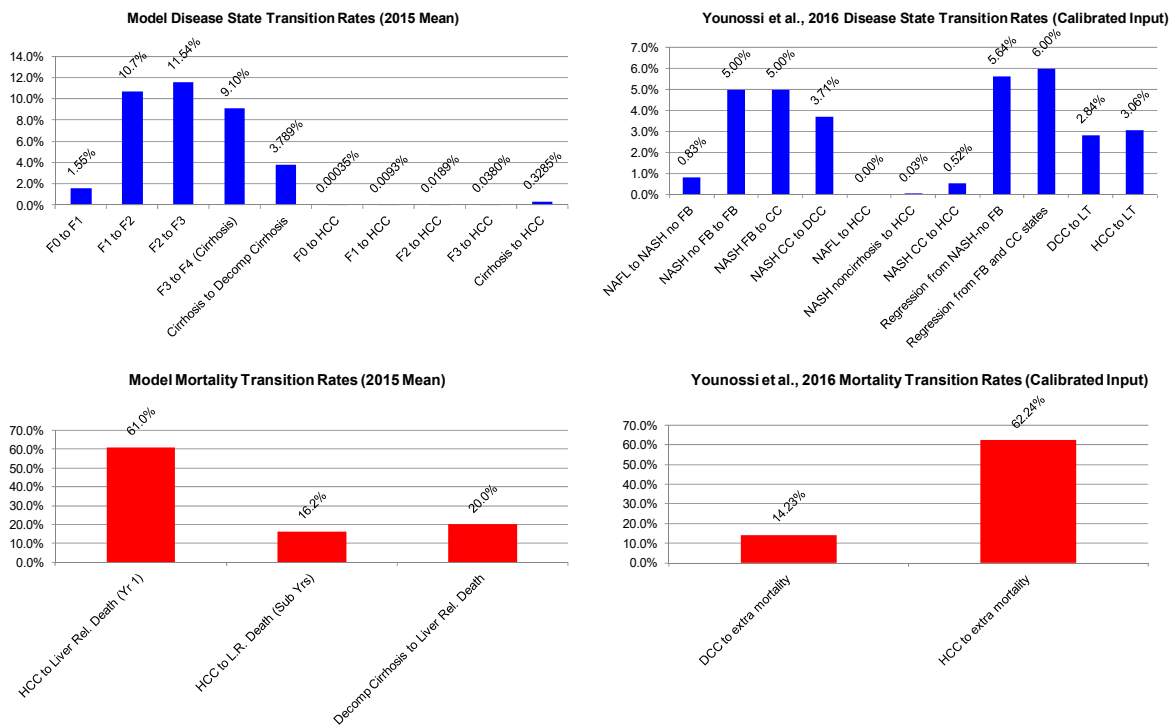

FB (fibrosis); CC (compensated cirrhosis); DCC (decompensated cirrhosis); LT (liver transplant)

### Section 3: Back Calculation of New NAFLD Cases (Incidence)

The annual number of new NAFLD cases (incidence) was not available and was back-calculated using the total number of NAFLD cases. Total NAFLD cases in 2015 (83.1 million) was assumed to be the sum of new NAFLD cases from 1950-2015 after adjustment for mortality as shown in the equation below.

$$\text{Total NAFLD Cases (Prevalent Cases)}_{\text{Year}_y} = \sum_{t=1950}^y (\text{New NAFLD Cases (Incident Cases)}_t - \text{Mortality}_t)$$

It was assumed anyone who developed incident NAFLD prior to 1950 is no longer alive. The total number of NAFLD cases in 2015 was known and the annual number of deaths (mortality) was calculated in the model using liver related and non-liver related deaths. Solving the above equation for new NAFLD cases provides the average number of new NAFLD cases per year.



To account for the fact that the number of new NAFLD cases was not constant over time, a relative incidence curve was used (Section 4).

Annual relative incidence values were used to describe changes in the annual number of new NAFLD cases over time. In step 1 of the back calculation, the relative incidence was estimated by year using the change in obesity and diabetes as described in Section 4. The Excel® Solver add-in was used to solve for the constant times the annual relative incidence that resulted in the known prevalence (83.1 million total NAFLD cases in 2015) after adjusting for mortality. This constant multiplied by the relative incidence provided the number of new NAFLD cases per year.

In step 2 of the back calculation, annual incident cases were distributed by age and gender to fit the adjusted NAFLD prevalence (Figure 3). A weighting factor was applied to reported prevalence by age and gender from national surveillance data (11) in order to total to 83.1 million cases in 2015. The percentage of the incident population allocated to each age and gender cohort in years 1950-1965 was set equal to 1966 and trended linearly in 5 five-year increments until 2011, at which point the percent of incident cases allocated to each age and gender cohort were held constant until 2030.

**Figure 3. Adjusted prevalence of NAFLD by age group and gender**

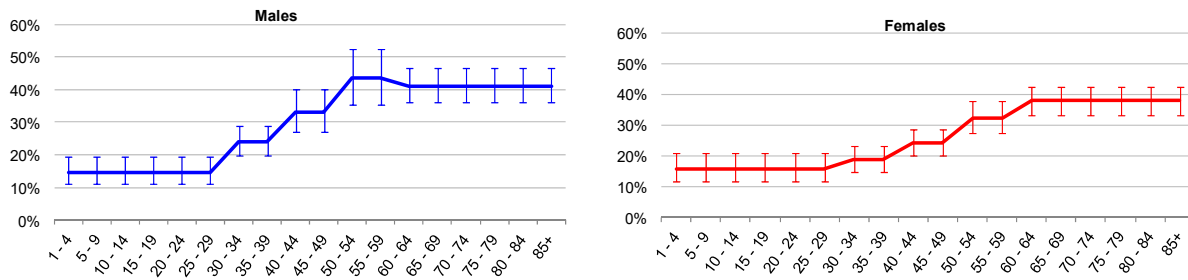

### Section 4: Relative Incidence

Relative changes in the number of total NAFLD cases were imputed from data related to trends for adult prevalence of obesity and diabetes mellitus (DM). Distribution of NAFL vs. NASH in these populations was used to impute the trends for these histological phenotypes (11-13).

Data were reported by the Centers for Disease Control and Prevention (CDC) for adult obesity beginning in 1960 when an estimated 13.3% of adults aged 20-74 years were classified as obese (body mass index  $\geq 30$ ) (14). By 2009-2010, the prevalence of adult obesity had increased to 35.7% based on National Health and Nutrition Examination Survey (NHANES) data. As shown in Figure 4, later estimates based on NHANES data estimated adult obesity at 35.1% in the US during 2011-2012, suggesting a leveling off of adult obesity rates during 2003-2012, after decades of steady growth (15). Future obesity prevalence among adults has been projected based on historical trends. Based on one projection scenario, adult obesity would increase from 30.94% in 2010 to 42.19% in 2030 (16).

**Figure 4. Adjust obesity and diabetes prevalence in the US (historical and projections)**

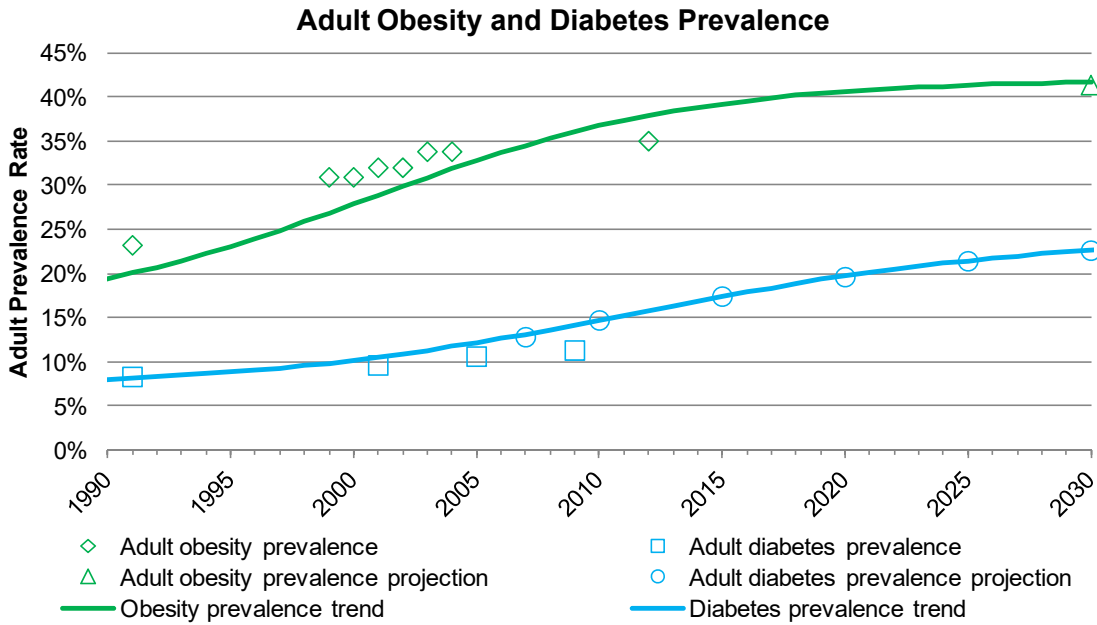

Unlike obesity, DM data were less readily available in years prior to 1990 due to changes in screening and diagnosis levels. In 1958, CDC estimated that 0.93% of adults had been diagnosed with DM, increasing to a maximum of 7.18% in 2013 (17). Estimates for combined diagnosed and undiagnosed DM were considered beginning in 1988-1994 when CDC estimated adult DM prevalence of 8.4% (18). As shown in Figure 4, by 2007-2010, adult DM prevalence was estimated at 11.4%. Finally, a modeling study considered the future prevalence of DM in the US under different intervention strategies. Without interventions, the prevalence of adult DM was projected to increase 12.9% in 2007 to 22.7% in 2030 (19).

The curves shown in Figure 4 were converted to total adult obese and DM cases by multiplying the prevalence times the US adult population in a given year. Incidence of obesity and DM were calculated by subtracting prevalence in each year from the prior year. The resulting incident cases were scaled as shown in Figure 5. Relative incidence for obesity and DM were used to develop the relative incidence curve for NAFLD, where it was assumed that peak NAFLD incidence would occur after peak adult obesity incidence and before peak DM incidence.

**Figure 5. Relative incidence of obesity, DM and NAFLD**

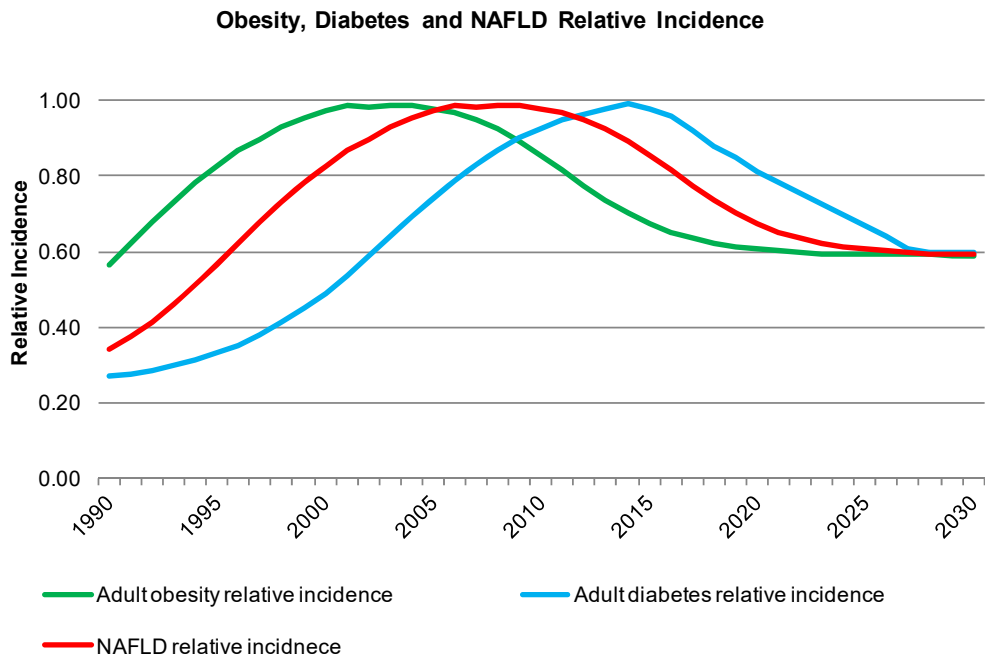

## Section 5. Delphi Process

| Activities                                 |    |                                                                                                                                                                                                                                                                                                                                                                                                                                                                                                                                                                                                                                                                                                                                                                                                                                                                                                                                       |
|--------------------------------------------|----|---------------------------------------------------------------------------------------------------------------------------------------------------------------------------------------------------------------------------------------------------------------------------------------------------------------------------------------------------------------------------------------------------------------------------------------------------------------------------------------------------------------------------------------------------------------------------------------------------------------------------------------------------------------------------------------------------------------------------------------------------------------------------------------------------------------------------------------------------------------------------------------------------------------------------------------|
| Phase 1 –<br>Data Gathering                | 1a | <p><b>Identify country experts who are willing to collaborate</b></p> <ul style="list-style-type: none"> <li>Experts were identified through NAFLD-related scientific contributions, or through referrals and recommendations from leading researchers.</li> </ul>                                                                                                                                                                                                                                                                                                                                                                                                                                                                                                                                                                                                                                                                    |
|                                            | 1b | <p><b>Literature Search</b></p> <ul style="list-style-type: none"> <li>Review the internal database for previously identified sources</li> <li>Review online sources (e.g., CDC, etc.) to capture non-indexed sources</li> <li>Run a literature search to identify recent publications</li> <li>Summarize input data available through the literature</li> <li>Gather empirical data for new HCC cases, liver transplants, percent of HCC and transplants due to NAFLD, percent of cases with obesity or DM</li> <li>Build draft model based on published data</li> <li>Schedule meeting with experts</li> </ul>                                                                                                                                                                                                                                                                                                                      |
| Phase 2 –<br>Country Meetings and Modeling | 2a | <p><b>Expert Meeting 1 (2-3 hours)</b></p> <ul style="list-style-type: none"> <li>Provide a background on the project, model and methodology</li> <li>Review data identified in Phase 1b and highlight gaps in data</li> <li>Request data in local non-indexed journals, unpublished data and any other available data (e.g., hospital-level data) that can be used to fill the gaps</li> <li>Gain agreement on data sources that can be used as for extrapolation when no local data are available</li> </ul> <p><b>Follow up with Experts Post Meeting 1</b></p> <ul style="list-style-type: none"> <li>Send minutes of the meeting and list of remaining action items to experts</li> <li>Follow up with experts to collect missing data and get copies of publications, government reports and unpublished data (e.g., raw hospital or registry-level data)</li> <li>Analyze raw data and send to experts for approval</li> </ul> |
|                                            | 2b |                                                                                                                                                                                                                                                                                                                                                                                                                                                                                                                                                                                                                                                                                                                                                                                                                                                                                                                                       |
|                                            | 2c | <p><b>Disease Burden Modeling</b></p> <ul style="list-style-type: none"> <li>Populate disease burden model with inputs and calibrate model to empirical data</li> <li>Schedule second meeting</li> <li>Develop a slide deck summarizing all inputs and associated data sources</li> <li>Perform a final check of the model and slide deck and approve internally</li> </ul>                                                                                                                                                                                                                                                                                                                                                                                                                                                                                                                                                           |
|                                            | 2d | <p><b>Expert Meeting 2 (2-3 hours)</b></p> <ul style="list-style-type: none"> <li>Review all inputs as well as data provided by experts since meeting 1 and results of analyses of any raw data provided</li> <li>Gain agreement on all inputs to be used in the model</li> <li>Update the model using any updated inputs</li> </ul>                                                                                                                                                                                                                                                                                                                                                                                                                                                                                                                                                                                                  |
| Phase 3 –<br>Follow-up Analyses            | 3a | <p><b>Follow-up Analyses</b></p> <ul style="list-style-type: none"> <li>Update model as necessary and send results to experts</li> <li>Provide support to address follow-up questions</li> <li>Finalize approved inputs and outputs</li> <li>Update analysis as new information becomes available (e.g., new national studies, updated treatment data)</li> </ul>                                                                                                                                                                                                                                                                                                                                                                                                                                                                                                                                                                     |

## Section 6: Supplementary Reference List

- Adams, L. A., George, J., Bugianesi, E., Rossi, E., De Boer, W. B., van der Poorten, D., . . . Jeffrey, G. P. (2011). Complex non-invasive fibrosis models are more accurate than simple models in non-alcoholic fatty liver disease. *J Gastroenterol Hepatol*, *26*(10), 1536-1543. doi:10.1111/j.1440-1746.2011.06774.x
- Adams, L. A., Harmsen, S., St Sauver, J. L., Charatcharoenwittaya, P., Enders, F. B., Therneau, T., & Angulo, P. (2010). Nonalcoholic fatty liver disease increases risk of death among patients with diabetes: a community-based cohort study. *Am J Gastroenterol*, *105*(7), 1567-1573. doi:10.1038/ajg.2010.18
- Adams, L. A., Lymp, J. F., St Sauver, J., Sanderson, S. O., Lindor, K. D., Feldstein, A., & Angulo, P. (2005). The natural history of nonalcoholic fatty liver disease: a population-based cohort study. *Gastroenterology*, *129*(1), 113-121.
- Alberti, G., Zimmet, P., Shaw, J., Bloomgarden, Z., Kaufman, F., & Silink, M. (2004). Type 2 diabetes in the young: the evolving epidemic: the international diabetes federation consensus workshop. *Diabetes Care*, *27*(7), 1798-1811.
- Altekruse, S. F., Henley, S. J., Cucinelli, J. E., & McGlynn, K. A. (2014). Changing hepatocellular carcinoma incidence and liver cancer mortality rates in the United States. *Am J Gastroenterol*, *109*(4), 542-553. doi:10.1038/ajg.2014.11
- Amarapurkar, D. N., & Patel, N. D. (2004). Clinical spectrum and natural history of non-alcoholic steatohepatitis with normal alanine aminotransferase values. *Trop Gastroenterol*, *25*(3), 130-134.
- Angulo, P., Bugianesi, E., Bjornsson, E. S., Charatcharoenwittaya, P., Mills, P. R., Barrera, F., . . . George, J. (2013). Simple noninvasive systems predict long-term outcomes of patients with nonalcoholic fatty liver disease. *Gastroenterology*, *145*(4), 782-789.e784. doi:10.1053/j.gastro.2013.06.057
- Angulo, P., Hui, J. M., Marchesini, G., Bugianesi, E., George, J., Farrell, G. C., . . . Day, C. P. (2007). The NAFLD fibrosis score: a noninvasive system that identifies liver fibrosis in patients with NAFLD. *Hepatology*, *45*(4), 846-854. doi:10.1002/hep.21496
- Angulo, P., Kleiner, D. E., Dam-Larsen, S., Adams, L. A., Bjornsson, E. S., Charatcharoenwittaya, P., . . . Bendtsen, F. (2015). Liver Fibrosis, but No Other Histologic Features, Is Associated With Long-term Outcomes of Patients With Nonalcoholic Fatty Liver Disease. *Gastroenterology*, *149*(2), 389-397.e310. doi:10.1053/j.gastro.2015.04.043
- Armstrong, M. J., Houlihan, D. D., Bentham, L., Shaw, J. C., Cramb, R., Olliff, S., . . . Newsome, P. N. (2012). Presence and severity of non-alcoholic fatty liver disease in a large prospective primary care cohort. *J Hepatol*, *56*(1), 234-240. doi:10.1016/j.jhep.2011.03.020

- Ascha, M. S., Hanouneh, I. A., Lopez, R., Tamimi, T. A., Feldstein, A. F., & Zein, N. N. (2010). The incidence and risk factors of hepatocellular carcinoma in patients with nonalcoholic steatohepatitis. *Hepatology*, *51*(6), 1972-1978. doi:10.1002/hep.23527
- Bedogni, G., Miglioli, L., Masutti, F., Tiribelli, C., Marchesini, G., & Bellentani, S. (2005). Prevalence of and risk factors for nonalcoholic fatty liver disease: the Dionysos nutrition and liver study. *Hepatology*, *42*(1), 44-52.
- Bhala, N., Angulo, P., van der Poorten, D., Lee, E., Hui, J. M., Saracco, G., . . . George, J. (2011). The natural history of nonalcoholic fatty liver disease with advanced fibrosis or cirrhosis: an international collaborative study. *Hepatology*, *54*(4), 1208-1216. doi:10.1002/hep.24491
- Bi, W. R., Yang, C. Q., Shi, Q., Xu, Y., Cao, C. P., Ling, J., & Wang, X. Y. (2014). Large-scale analysis of factors influencing nonalcoholic fatty liver disease and its relationship with liver enzymes. *Genet Mol Res*, *13*(3), 5880-5891. doi:10.4238/2014.August.7.3
- Browning, J. D., Szczepaniak, L. S., Dobbins, R., Nuremberg, P., Horton, J. D., Cohen, J. C., . . . Hobbs, H. H. (2004). Prevalence of hepatic steatosis in an urban population in the United States: impact of ethnicity. *Hepatology*, *40*(6), 1387-1395.
- Byrne, C. D., & Targher, G. (2015). NAFLD: a multisystem disease *J Hepatol*, *62*(1 Suppl), S47-64. doi:10.1016/j.jhep.2014.12.012
- Byrne, C. D., & Targher, G. (2016). EASL-EASD-EASO Clinical Practice Guidelines for the management of non-alcoholic fatty liver disease: is universal screening appropriate? *Diabetologia*, *59*(6), 1141-1144. doi:10.1007/s00125-016-3910-y
- Caballeria, L., Pera, G., Auladell, M. A., Toran, P., Munoz, L., Miranda, D., . . . Aizpurua, M. M. (2010). Prevalence and factors associated with the presence of nonalcoholic fatty liver disease in an adult population in Spain. *Eur.J Gastroenterol.Hepatol*, *22*(1), 24-32.
- Caballeria, L., Pera, G., Rodriguez, L., Auladell, M. A., Bernad, J., Canut, S., & Toran, P. (2012). Metabolic syndrome and nonalcoholic fatty liver disease in a Spanish population: influence of the diagnostic criteria used. *Eur J Gastroenterol Hepatol*, *24*(9), 1007-1011. doi:10.1097/MEG.0b013e328355b87f
- Chalasani, N., Younossi, Z., Lavine, J. E., Diehl, A. M., Brunt, E. M., Cusi, K., . . . Sanyal, A. J. (2012). The diagnosis and management of non-alcoholic fatty liver disease: practice guideline by the American Gastroenterological Association, American Association for the Study of Liver Diseases, and American College of Gastroenterology. *Gastroenterology*, *142*(7), 1592-1609.
- Cheng, Y. J., Imperatore, G., Geiss, L. S., Wang, J., Saydah, S. H., Cowie, C. C., & Gregg, E. W. (2013). Secular changes in the age-specific prevalence of diabetes among U.S. adults: 1988-2010. *Diabetes Care*, *36*(9), 2690-2696.

- Corey, K. E., Kartoun, U., Zheng, H., Chung, R. T., & Shaw, S. Y. (2016). Using an Electronic Medical Records Database to Identify Non-Traditional Cardiovascular Risk Factors in Nonalcoholic Fatty Liver Disease. *Am J Gastroenterol*, 111(5), 671-676. doi:10.1038/ajg.2016.44
- Corey, K. E., Kartoun, U., Zheng, H., & Shaw, S. Y. (2016). Development and Validation of an Algorithm to Identify Nonalcoholic Fatty Liver Disease in the Electronic Medical Record. *Dig Dis Sci*, 61(3), 913-919. doi:10.1007/s10620-015-3952-x
- Corey, K. E., Klebanoff, M. J., Tramontano, A. C., Chung, R. T., & Hur, C. (2016). Screening for Nonalcoholic Steatohepatitis in Individuals with Type 2 Diabetes: A Cost-Effectiveness Analysis. *Dig Dis Sci*, 61(7), 2108-2117. doi:10.1007/s10620-016-4044-2
- Doycheva, I., Cui, J., Nguyen, P., Costa, E. A., Hooker, J., Hofflich, H., . . . Loomba, R. (2016). Non-invasive screening of diabetics in primary care for NAFLD and advanced fibrosis by MRI and MRE. *Aliment Pharmacol Ther*, 43(1), 83-95. doi:10.1111/apt.13405
- Doycheva, I., Watt, K. D., Rifai, G., Abou Mrad, R., Lopez, R., Zein, N. N., . . . Alkhoury, N. (2017). Increasing Burden of Chronic Liver Disease Among Adolescents and Young Adults in the USA: A Silent Epidemic. *Dig Dis Sci*. doi:10.1007/s10620-017-4492-3
- Goossens, N., Hoshida, Y., Song, W. M., Jung, M., Morel, P., Nakagawa, S., . . . Giostra, E. (2016). Nonalcoholic Steatohepatitis Is Associated With Increased Mortality in Obese Patients Undergoing Bariatric Surgery. *Clin Gastroenterol Hepatol*, 14(11), 1619-1628. doi:10.1016/j.cgh.2015.10.010
- Grant, L. M., & Lisker-Melman, M. (2004). Nonalcoholic fatty liver disease. *Ann Hepatol*, 3(3), 93-99.
- Ground, K. E. (1982). Liver pathology in aircrew. *Aviat Space Environ Med*, 53(1), 14-18.
- Harrison, S. A., & Day, C. P. (2007). Benefits of lifestyle modification in NAFLD. *Gut*, 56(12), 1760-1769. doi:10.1136/gut.2006.112094
- Harrison, S. A., & Neuschwander-Tetri, B. A. (2004). Nonalcoholic fatty liver disease and nonalcoholic steatohepatitis. *Clin Liver Dis*, 8(4), 861-879, ix. doi:10.1016/j.cld.2004.06.008
- Harrison, S. A., Oliver, D., Arnold, H. L., Gogia, S., & Neuschwander-Tetri, B. A. (2008). Development and validation of a simple NAFLD clinical scoring system for identifying patients without advanced disease. *Gut*, 57(10), 1441-1447. doi:10.1136/gut.2007.146019
- Kabbany, M. N., Conjeevaram Selvakumar, P. K., Watt, K., Lopez, R., Akkas, Z., Zein, N., . . . Alkhoury, N. (2017). Prevalence of Nonalcoholic Steatohepatitis-Associated Cirrhosis in



- the United States: An Analysis of National Health and Nutrition Examination Survey Data. *Am J Gastroenterol*, 112(4), 581-587. doi:10.1038/ajg.2017.5
- Kanwal, F., Kramer, J. R., Duan, Z., Yu, X., White, D., & El-Serag, H. B. (2016). Trends in the Burden of Nonalcoholic Fatty Liver Disease in a United States Cohort of Veterans. *Clin Gastroenterol Hepatol*, 14(2), 301-308.e301-302. doi:10.1016/j.cgh.2015.08.010
- Kim, Y. S., Jung, E. S., Hur, W., Bae, S. H., Choi, J. Y., Song, M. J., . . . Yoon, S. K. (2013). Noninvasive predictors of nonalcoholic steatohepatitis in Korean patients with histologically proven nonalcoholic fatty liver disease. *Clin.Mol.Hepatol*, 19(2), 120-130.
- Klebanoff, M. J., Corey, K. E., Chhatwal, J., Kaplan, L. M., Chung, R. T., & Hur, C. (2017). Bariatric surgery for nonalcoholic steatohepatitis: A clinical and cost-effectiveness analysis. *Hepatology*, 65(4), 1156-1164. doi:10.1002/hep.28958
- Kleiner, D. E., Brunt, E. M., Van Natta, M., Behling, C., Contos, M. J., Cummings, O. W., . . . Sanyal, A. J. (2005). Design and validation of a histological scoring system for nonalcoholic fatty liver disease. *Hepatology*, 41(6), 1313-1321. doi:10.1002/hep.20701
- Koehler, E. M., Plompen, E. P., Schouten, J. N., Hansen, B. E., Darwish Murad, S., Taimr, P., . . . Janssen, H. L. (2016). Presence of diabetes mellitus and steatosis is associated with liver stiffness in a general population: The Rotterdam study. *Hepatology*, 63(1), 138-147. doi:10.1002/hep.27981
- Lau, C. S., Mahendraraj, K., & Chamberlain, R. S. (2015). Hepatocellular Carcinoma in the Pediatric Population: A Population Based Clinical Outcomes Study Involving 257 Patients from the Surveillance, Epidemiology, and End Result (SEER) Database (1973-2011). *HPB Surg*, 2015, 670728. doi:10.1155/2015/670728
- Lazo, M., Hernaez, R., Bonekamp, S., Kamel, I. R., Brancati, F. L., Guallar, E., & Clark, J. M. (2011). Non-alcoholic fatty liver disease and mortality among US adults: prospective cohort study. *Bmj*, 343, d6891. doi:10.1136/bmj.d6891
- Lazo, M., Hernaez, R., Eberhardt, M. S., Bonekamp, S., Kamel, I., Guallar, E., . . . Clark, J. M. (2013). Prevalence of nonalcoholic fatty liver disease in the United States: the Third National Health and Nutrition Examination Survey, 1988-1994. *Am.J Epidemiol.*, 178(1), 38-45.
- Loomba, R., Wolfson, T., Ang, B., Hooker, J., Behling, C., Peterson, M., . . . Sirlin, C. (2014). Magnetic resonance elastography predicts advanced fibrosis in patients with nonalcoholic fatty liver disease: a prospective study. *Hepatology*, 60(6), 1920-1928. doi:10.1002/hep.27362
- Loomis, A. K., Kabadi, S., Preiss, D., Hyde, C., Bonato, V., St Louis, M., . . . Sattar, N. (2016). Body Mass Index and Risk of Nonalcoholic Fatty Liver Disease: Two Electronic Health

- Record Prospective Studies. *J Clin Endocrinol Metab*, 101(3), 945-952. doi:10.1210/jc.2015-3444
- Manning, P., Murphy, P., Wang, K., Hooker, J., Wolfson, T., Middleton, M. S., . . . Sirlin, C. B. (2017). Liver histology and diffusion-weighted MRI in children with nonalcoholic fatty liver disease: A MAGNET study. *J Magn Reson Imaging*. doi:10.1002/jmri.25663
- Marchesini, G., Brizi, M., Morselli-Labate, A. M., Bianchi, G., Bugianesi, E., McCullough, A. J., . . . Melchionda, N. (1999). Association of nonalcoholic fatty liver disease with insulin resistance. *Am J Med*, 107(5), 450-455.
- McPherson, S., Hardy, T., Henderson, E., Burt, A. D., Day, C. P., & Anstee, Q. M. (2015). Evidence of NAFLD progression from steatosis to fibrosing-steatohepatitis using paired biopsies: implications for prognosis and clinical management. *J Hepatol*, 62(5), 1148-1155. doi:10.1016/j.jhep.2014.11.034
- McPherson, S., Stewart, S. F., Henderson, E., Burt, A. D., & Day, C. P. (2010). Simple non-invasive fibrosis scoring systems can reliably exclude advanced fibrosis in patients with non-alcoholic fatty liver disease. *Gut*, 59(9), 1265-1269. doi:10.1136/gut.2010.216077
- Michelotti, G. A., Machado, M. V., & Diehl, A. M. (2013). NAFLD, NASH and liver cancer. *Nat.Rev Gastroenterol.Hepatol*, 10(11), 656-665.
- Musso, G., Gambino, R., Cassader, M., & Pagano, G. (2011). Meta-analysis: natural history of non-alcoholic fatty liver disease (NAFLD) and diagnostic accuracy of non-invasive tests for liver disease severity. *Ann.Med.*, 43(8), 617-649.
- National Center for Health Statistics. (2016). *Health, United States, 2015: With Special Feature on Racial and Ethnic Health Disparities*. Retrieved from <http://www.cdc.gov/nchs/data/hus/hus15.pdf>
- Neff, G. W., Duncan, C. W., & Schiff, E. R. (2011). The current economic burden of cirrhosis. *Gastroenterol Hepatol (N Y)*, 7(10), 661-671.
- Pais, R., Charlotte, F., Fedchuk, L., Bedossa, P., Lebray, P., Poynard, T., & Ratziu, V. (2013). A systematic review of follow-up biopsies reveals disease progression in patients with non-alcoholic fatty liver. *J Hepatol*, 59(3), 550-556. doi:10.1016/j.jhep.2013.04.027
- Portillo-Sanchez, P., Bril, F., Maximos, M., Lomonaco, R., Biernacki, D., Orsak, B., . . . Cusi, K. (2015). High Prevalence of Nonalcoholic Fatty Liver Disease in Patients With Type 2 Diabetes Mellitus and Normal Plasma Aminotransferase Levels. *J Clin Endocrinol Metab*, 100(6), 2231-2238. doi:10.1210/jc.2015-1966
- Poynard, T., Lebray, P., Ingiliz, P., Varaut, A., Varsat, B., Ngo, Y., . . . Giordanella, J. P. (2010). Prevalence of liver fibrosis and risk factors in a general population using non-invasive biomarkers (FibroTest). *BMC Gastroenterol.*, 10, 40.

- Rahman, R., Hammoud, G. M., Almashhrawi, A. A., Ahmed, K. T., & Ibdah, J. A. (2013). Primary hepatocellular carcinoma and metabolic syndrome: An update. *World J Gastrointest Oncol*, 5(9), 186-194. doi:10.4251/wjgo.v5.i9.186
- Rahman, R. N., & Ibdah, J. A. (2012). Nonalcoholic fatty liver disease without cirrhosis is an emergent and independent risk factor of hepatocellular carcinoma: A population based study. *Hepatology*(56), 241A.
- Ries, L., Young, G., Keel, G., Eisner, M., Lin, Y., & Horner, M. (2007) SEER survival monograph: Cancer survival among adults: U.S. SEER program, 1988-2001, patient and tumor characteristics. Vol. *NIH Pub. No. 07-6215*. Bethesda, MD: National Cancer Institute, SEER Program.
- Rinella, M. E. (2015). Nonalcoholic fatty liver disease: a systematic review. *JAMA*, 313(22), 2263-2273. doi:10.1001/jama.2015.5370
- Sanyal, A., Poklepovic, A., Moyneur, E., & Barghout, V. (2010). Population-based risk factors and resource utilization for HCC: US perspective. *Curr Med Res Opin*, 26(9), 2183-2191. doi:10.1185/03007995.2010.506375
- Sanyal, A. J. (2002). AGA technical review on nonalcoholic fatty liver disease. *Gastroenterology*, 123(5), 1705-1725.
- Sanyal, A. J., Banas, C., Sargeant, C., Luketic, V. A., Sterling, R. K., Stravitz, R. T., . . . Mills, A. S. (2006). Similarities and differences in outcomes of cirrhosis due to nonalcoholic steatohepatitis and hepatitis C. *Hepatology*, 43(4), 682-689. doi:10.1002/hep.21103
- Schwimmer, J. B., Deutsch, R., Kahen, T., Lavine, J. E., Stanley, C., & Behling, C. (2006). Prevalence of fatty liver in children and adolescents. *Pediatrics*, 118(4), 1388-1393. doi:10.1542/peds.2006-1212
- SEER. (2016a, August 10th 2016). SEER Stat Fact Sheets: Liver and Intrahepatic Bile Duct Cancer. April 2016. Retrieved from <http://seer.cancer.gov/statfacts/html/livibd.html>
- SEER. (2016b). Surveillance, Epidemiology, and End Results (SEER) Program Research Data (1973-2013). Surveillance, Epidemiology, and End Results (SEER) Program Retrieved August 10th 2016, from National Cancer Institute [www.seer.cancer.gov](http://www.seer.cancer.gov)
- Shah, A. G., Lydecker, A., Murray, K., Tetri, B. N., Contos, M. J., & Sanyal, A. J. (2009). Comparison of noninvasive markers of fibrosis in patients with nonalcoholic fatty liver disease. *Clin Gastroenterol Hepatol*, 7(10), 1104-1112. doi:10.1016/j.cgh.2009.05.033
- Siddiqui, M. S., Patidar, K. R., Boyett, S., Luketic, V. A., Puri, P., & Sanyal, A. J. (2015). Performance of Non-invasive Models of Fibrosis in Predicting Mild to Moderate Fibrosis in Patients with Nonalcoholic Fatty Liver Disease (NAFLD). *Liver Int*. doi:10.1111/liv.13054

- Stepanova, M., Rafiq, N., Makhlof, H., Agrawal, R., Kaur, I., Younoszai, Z., . . . Younossi, Z. M. (2013). Predictors of All-Cause Mortality and Liver-Related Mortality in Patients with Non-Alcoholic Fatty Liver Disease (NAFLD). *Dig.Dis.Sci.*, 58(10), 3017-3023.
- Targher, G., Bertolini, L., Padovani, R., Rodella, S., Tessari, R., Zenari, L., . . . Arcaro, G. (2007). Prevalence of nonalcoholic fatty liver disease and its association with cardiovascular disease among type 2 diabetic patients. *Diabetes Care*, 30(5), 1212-1218. doi:10.2337/dc06-2247
- Targher, G., Byrne, C. D., Lonardo, A., Zoppini, G., & Barbui, C. (2016). Nonalcoholic Fatty Liver Disease and Risk of Incident Cardiovascular Disease: A Meta-Analysis of Observational Studies. *J Hepatol*. doi:10.1016/j.jhep.2016.05.013
- Verma, S., Jensen, D., Hart, J., & Mohanty, S. R. (2013). Predictive value of ALT levels for non-alcoholic steatohepatitis (NASH) and advanced fibrosis in non-alcoholic fatty liver disease (NAFLD). *Liver Int*, 33(9), 1398-1405. doi:10.1111/liv.12226
- Vernon, G., Baranova, A., & Younossi, Z. M. (2011). Systematic review: the epidemiology and natural history of non-alcoholic fatty liver disease and non-alcoholic steatohepatitis in adults. *Aliment.Pharmacol.Ther.*, 34(3), 274-285.
- Wattacheril, J., & Chalasani, N. (2012). Nonalcoholic fatty liver disease (NAFLD): is it really a serious condition? *Hepatology*, 56(4), 1580-1584.
- Whalley, S., Puvanachandra, P., Desai, A., & Kennedy, H. (2007). Hepatology outpatient service provision in secondary care: a study of liver disease incidence and resource costs. *Clin Med (Lond)*, 7(2), 119-124.
- White, D. L., Kanwal, F., & El-Serag, H. B. (2012). Association between nonalcoholic fatty liver disease and risk for hepatocellular cancer, based on systematic review. *Clin Gastroenterol Hepatol*, 10(12), 1342-1359.e1342. doi:10.1016/j.cgh.2012.10.001
- Williams, C. D., Stengel, J., Asike, M. I., Torres, D. M., Shaw, J., Contreras, M., . . . Harrison, S. A. (2011). Prevalence of nonalcoholic fatty liver disease and nonalcoholic steatohepatitis among a largely middle-aged population utilizing ultrasound and liver biopsy: a prospective study. *Gastroenterology*, 140(1), 124-131. doi:10.1053/j.gastro.2010.09.038
- Wong, R. J., Aguilar, M., Cheung, R., Perumpail, R. B., Harrison, S. A., Younossi, Z. M., & Ahmed, A. (2015). Nonalcoholic steatohepatitis is the second leading etiology of liver disease among adults awaiting liver transplantation in the United States. *Gastroenterology*, 148(3), 547-555. doi:10.1053/j.gastro.2014.11.039
- Wong, R. J., Cheung, R., & Ahmed, A. (2014). Nonalcoholic steatohepatitis is the most rapidly growing indication for liver transplantation in patients with hepatocellular carcinoma in the U.S. *Hepatology*, 59(6), 2188-2195. doi:10.1002/hep.26986

- Yang, K. C., Hung, H. F., Lu, C. W., Chang, H. H., Lee, L. T., & Huang, K. C. (2016). Association of Non-alcoholic Fatty Liver Disease with Metabolic Syndrome Independently of Central Obesity and Insulin Resistance. *Sci Rep*, 6, 27034. doi:10.1038/srep27034
- Yilmaz, Y. (2012). Review article: is non-alcoholic fatty liver disease a spectrum, or are steatosis and non-alcoholic steatohepatitis distinct conditions? *Aliment.Pharmacol.Ther.*, 36(9), 815-823.
- Younossi, Z. M., Blissett, D., Blissett, R., Henry, L., Stepanova, M., Younossi, Y., . . . Beckerman, R. (2016). The economic and clinical burden of nonalcoholic fatty liver disease in the United States and Europe. *Hepatology*, 64(5), 1577-1586. doi:10.1002/hep.28785
- Younossi, Z. M., & Henry, L. (2015). Economic and Quality-of-Life Implications of Non-Alcoholic Fatty Liver Disease. *Pharmacoeconomics*, 33(12), 1245-1253. doi:10.1007/s40273-015-0316-5
- Younossi, Z. M., Koenig, A. B., Abdelatif, D., Fazel, Y., Henry, L., & Wymer, M. (2015). Global Epidemiology of Non-Alcoholic Fatty Liver Disease-Meta-Analytic Assessment of Prevalence, Incidence and Outcomes. *Hepatology*. doi:10.1002/hep.28431
- Younossi, Z. M., Otgonsuren, M., Henry, L., Venkatesan, C., Mishra, A., Erario, M., & Hunt, S. (2015). Association of nonalcoholic fatty liver disease (NAFLD) with hepatocellular carcinoma (HCC) in the United States from 2004 to 2009. *Hepatology*, 62(6), 1723-1730. doi:10.1002/hep.28123
- Younossi, Z. M., Zheng, L., Stepanova, M., Henry, L., Venkatesan, C., & Mishra, A. (2015). Trends in outpatient resource utilizations and outcomes for Medicare beneficiaries with nonalcoholic fatty liver disease. *J Clin Gastroenterol*, 49(3), 222-227. doi:10.1097/mcg.0000000000000071
- Younossi, Z. M., Zheng, L., Stepanova, M., Venkatesan, C., & Mishra, A. (2014). Clinical outcomes and resource utilisation in Medicare patients with chronic liver disease: a historical cohort study. *BMJ Open*, 4(5), e004318. doi:10.1136/bmjopen-2013-004318

## References

1. United Nations. Department of Economic Social Affairs Population Division. World population prospects: The 2015 revision. New York: United Nations; 2016.
2. Singh S, Allen AM, Wang Z, Prokop LJ, Murad MH, Loomba R. Fibrosis progression in nonalcoholic fatty liver vs nonalcoholic steatohepatitis: a systematic review and meta-analysis of paired-biopsy studies. *Clinical gastroenterology and hepatology : the official clinical practice journal of the American Gastroenterological Association*. 2015;13(4):643-54.e1-9; quiz e39-40.
3. Rahman RN, Ibdah JA. Nonalcoholic fatty liver disease without cirrhosis is an emergent and independent risk factor of hepatocellular carcinoma: A population based study. *Hepatology*. 2012(56):241A.
4. Younossi ZM, Otgonsuren M, Henry L, Venkatesan C, Mishra A, Erario M, et al. Association of nonalcoholic fatty liver disease (NAFLD) with hepatocellular carcinoma (HCC) in the United States from 2004 to 2009. *Hepatology*. 2015;62(6):1723-30.
5. Sanyal AJ, Banas C, Sargeant C, Luketic VA, Sterling RK, Stravitz RT, et al. Similarities and differences in outcomes of cirrhosis due to nonalcoholic steatohepatitis and hepatitis C. *Hepatology*. 2006;43(4):682-9.
6. Ries L, Young G, Keel G, Eisner M, Lin Y, Horner M. SEER survival monograph: Cancer survival among adults: U.S. SEER program, 1988-2001, patient and tumor characteristics. Bethesda, MD: National Cancer Institute, SEER Program; 2007.
7. Surveillance, Epidemiology, and End Results (SEER) Program Research Data (1973-2013) [Internet]. National Cancer Institute. 2016 [cited August 10th 2016]. Available from: [www.seer.cancer.gov](http://www.seer.cancer.gov).
8. Altekruse SF, Henley SJ, Cucinelli JE, McGlynn KA. Changing hepatocellular carcinoma incidence and liver cancer mortality rates in the United States. *Am J Gastroenterol*. 2014;109(4):542-53.
9. Younossi ZM, Blissett D, Blissett R, Henry L, Stepanova M, Younossi Y, et al. The economic and clinical burden of nonalcoholic fatty liver disease in the United States and Europe. *Hepatology*. 2016;64(5):1577-86.

10. Barendregt JJ, Van Oortmarssen GJ, Vos T, Murray CJ. A generic model for the assessment of disease epidemiology: the computational basis of DisMod II. *Population health metrics*. 2003;1(1):4.
11. Lazo M, Hernaez R, Eberhardt MS, Bonekamp S, Kamel I, Guallar E, et al. Prevalence of nonalcoholic fatty liver disease in the United States: the Third National Health and Nutrition Examination Survey, 1988-1994. *AmJ Epidemiol*. 2013;178(1):38-45.
12. Younossi ZM, Koenig AB, Abdelatif D, Fazel Y, Henry L, Wymer M. Global Epidemiology of Non-Alcoholic Fatty Liver Disease-Meta-Analytic Assessment of Prevalence, Incidence and Outcomes. *Hepatology*. 2015.
13. Portillo-Sanchez P, Bril F, Maximos M, Lomonaco R, Biernacki D, Orsak B, et al. High Prevalence of Nonalcoholic Fatty Liver Disease in Patients With Type 2 Diabetes Mellitus and Normal Plasma Aminotransferase Levels. *The Journal of clinical endocrinology and metabolism*. 2015;100(6):2231-8.
14. Fryar CD, Carroll MD, Ogden CL. Prevalence of Overweight, Obesity, and Extreme Obesity Among Adults: United States, Trends 1960-1962 Through 2009-2010. Centers for Disease Control and Prevention; 2012.
15. Ogden CL, Carroll MD, Kit BK, Flegal KM. Prevalence of childhood and adult obesity in the United States, 2011-2012. *Jama*. 2014;311(8):806-14.
16. Finkelstein EA, Khavjou OA, Thompson H, Trogdon JG, Pan L, Sherry B, et al. Obesity and severe obesity forecasts through 2030. *American journal of preventive medicine*. 2012;42(6):563-70.
17. CDC Division of Diabetes Translation. Long-term trends in diagnosed diabetes. 2016 2016.
18. National Center for Health Statistics. Health, United States, 2015: With Special Feature on Racial and Ethnic Health Disparities. 2016.
19. Gregg EW, Boyle JP, Thompson TJ, Barker LE, Albright AL, Williamson DF. Modeling the impact of prevention policies on future diabetes prevalence in the United States: 2010-2030. *Population health metrics*. 2013;11(1):18.
